# Supplementary material
Source: PubMed Central journal article supplement (PMC5706109)
Supplement: NIHMS921481-supplement-Table_3.pdf [file NIHMS921481-supplement-Table_3.pdf]

**Table 3.** Treatment-Related Grade 3+ Adverse Events – All Cycles (**supplemental table**)

| System Organ Class/Term                | Treatment/Adverse Event Grade                     |          |                                                   |          |                                                   |          |                                                   |          |                                                   |          |                                                   |          |                                                   |          |               |          |
|----------------------------------------|---------------------------------------------------|----------|---------------------------------------------------|----------|---------------------------------------------------|----------|---------------------------------------------------|----------|---------------------------------------------------|----------|---------------------------------------------------|----------|---------------------------------------------------|----------|---------------|----------|
|                                        | BTZ 0.5 mg/m <sup>2</sup><br>+ CRB 5 AUC<br>(N=6) |          | BTZ 0.5 mg/m <sup>2</sup><br>+ CRB 4 AUC<br>(N=6) |          | BTZ 0.9 mg/m <sup>2</sup><br>+ CRB 4 AUC<br>(N=5) |          | BTZ 1.3 mg/m <sup>2</sup><br>+ CRB 4 AUC<br>(N=3) |          | BTZ 1.7 mg/m <sup>2</sup><br>+ CRB 4 AUC<br>(N=3) |          | BTZ 2.1 mg/m <sup>2</sup><br>+ CRB 4 AUC<br>(N=3) |          | BTZ 2.5 mg/m <sup>2</sup><br>+ CRB 4 AUC<br>(N=6) |          | All<br>(N=32) |          |
|                                        | G3                                                | G4       | G3            | G4       |
| <b>Blood/Lymphatics</b>                | <b>1</b>                                          | <b>0</b> | <b>1</b>                                          | <b>0</b> | <b>1</b>                                          | <b>0</b> | <b>0</b>                                          | <b>0</b> | <b>0</b>                                          | <b>0</b> | <b>0</b>                                          | <b>0</b> | <b>1</b>                                          | <b>0</b> | <b>4</b>      | <b>0</b> |
| Anemia                                 | 1                                                 | 0        | 1                                                 | 0        | 1                                                 | 0        | 0                                                 | 0        | 0                                                 | 0        | 0                                                 | 0        | 1                                                 | 0        | 4             | 0        |
| <b>Gastrointestinal</b>                | <b>2</b>                                          | <b>0</b> | <b>1</b>                                          | <b>0</b> | <b>0</b>                                          | <b>0</b> | <b>1</b>                                          | <b>0</b> | <b>1</b>                                          | <b>0</b> | <b>0</b>                                          | <b>0</b> | <b>4</b>                                          | <b>0</b> | <b>9</b>      | <b>0</b> |
| Abdominal pain                         | 1                                                 | 0        | 0                                                 | 0        | 0                                                 | 0        | 0                                                 | 0        | 0                                                 | 0        | 0                                                 | 0        | 3                                                 | 0        | 4             | 0        |
| Diarrhea                               | 1                                                 | 0        | 0                                                 | 0        | 0                                                 | 0        | 1                                                 | 0        | 1                                                 | 0        | 0                                                 | 0        | 1                                                 | 0        | 4             | 0        |
| Nausea                                 | 2                                                 | 0        | 1                                                 | 0        | 0                                                 | 0        | 0                                                 | 0        | 0                                                 | 0        | 0                                                 | 0        | 2                                                 | 0        | 5             | 0        |
| Vomiting                               | 1                                                 | 0        | 1                                                 | 0        | 0                                                 | 0        | 0                                                 | 0        | 0                                                 | 0        | 0                                                 | 0        | 2                                                 | 0        | 4             | 0        |
| <b>General and administration site</b> | <b>0</b>                                          | <b>0</b> | <b>1</b>                                          | <b>0</b> | <b>1</b>                                          | <b>0</b> | <b>0</b>                                          | <b>0</b> | <b>0</b>                                          | <b>0</b> | <b>0</b>                                          | <b>0</b> | <b>2</b>                                          | <b>0</b> | <b>4</b>      | <b>0</b> |
| Fatigue                                | 0                                                 | 0        | 0                                                 | 0        | 1                                                 | 0        | 0                                                 | 0        | 0                                                 | 0        | 0                                                 | 0        | 1                                                 | 0        | 2             | 0        |
| Infusion related reaction              | 0                                                 | 0        | 0                                                 | 0        | 0                                                 | 0        | 0                                                 | 0        | 0                                                 | 0        | 0                                                 | 0        | 1                                                 | 0        | 1             | 0        |
| Pain                                   | 0                                                 | 0        | 1                                                 | 0        | 0                                                 | 0        | 0                                                 | 0        | 0                                                 | 0        | 0                                                 | 0        | 0                                                 | 0        | 1             | 0        |
| <b>Immune System</b>                   | <b>0</b>                                          | <b>0</b> | <b>1</b>                                          | <b>0</b> | <b>1</b>      | <b>0</b> |
| Allergic reaction                      | 0                                                 | 0        | 0                                                 | 0        | 0                                                 | 0        | 0                                                 | 0        | 0                                                 | 0        | 0                                                 | 0        | 1                                                 | 0        | 1             | 0        |
| <b>Infections/infestations</b>         | <b>1</b>                                          | <b>0</b> | <b>0</b>                                          | <b>0</b> | <b>1</b>      | <b>0</b> |
| Lung infection                         | 1                                                 | 0        | 0                                                 | 0        | 0                                                 | 0        | 0                                                 | 0        | 0                                                 | 0        | 0                                                 | 0        | 0                                                 | 0        | 1             | 0        |
| <b>Investigations</b>                  | <b>1</b>                                          | <b>1</b> | <b>2</b>                                          | <b>1</b> | <b>0</b>                                          | <b>0</b> | <b>0</b>                                          | <b>0</b> | <b>0</b>                                          | <b>0</b> | <b>1</b>                                          | <b>0</b> | <b>1</b>                                          | <b>0</b> | <b>5</b>      | <b>2</b> |
| Neutrophil count decreased             | 1                                                 | 1        | 2                                                 | 0        | 0                                                 | 0        | 0                                                 | 0        | 0                                                 | 0        | 1                                                 | 0        | 0                                                 | 0        | 4             | 1        |
| Platelet count decreased               | 0                                                 | 1        | 1                                                 | 1        | 0                                                 | 0        | 0                                                 | 0        | 0                                                 | 0        | 0                                                 | 0        | 1                                                 | 0        | 2             | 2        |
| White blood cell decreased             | 0                                                 | 1        | 1                                                 | 0        | 0                                                 | 0        | 0                                                 | 0        | 0                                                 | 0        | 1                                                 | 0        | 0                                                 | 0        | 2             | 1        |

| System Organ Class/Term                  | Treatment/Adverse Event Grade                     |          |                                                   |          |                                                   |          |                                                   |          |                                                   |          |                                                   |          |                                                   |          |               |          |
|------------------------------------------|---------------------------------------------------|----------|---------------------------------------------------|----------|---------------------------------------------------|----------|---------------------------------------------------|----------|---------------------------------------------------|----------|---------------------------------------------------|----------|---------------------------------------------------|----------|---------------|----------|
|                                          | BTZ 0.5 mg/m <sup>2</sup><br>+ CRB 5 AUC<br>(N=6) |          | BTZ 0.5 mg/m <sup>2</sup><br>+ CRB 4 AUC<br>(N=6) |          | BTZ 0.9 mg/m <sup>2</sup><br>+ CRB 4 AUC<br>(N=5) |          | BTZ 1.3 mg/m <sup>2</sup><br>+ CRB 4 AUC<br>(N=3) |          | BTZ 1.7 mg/m <sup>2</sup><br>+ CRB 4 AUC<br>(N=3) |          | BTZ 2.1 mg/m <sup>2</sup><br>+ CRB 4 AUC<br>(N=3) |          | BTZ 2.5 mg/m <sup>2</sup><br>+ CRB 4 AUC<br>(N=6) |          | All<br>(N=32) |          |
|                                          | G3                                                | G4       | G3            | G4       |
| <b>Metabolism/nutrition</b>              | <b>0</b>                                          | <b>0</b> | <b>2</b>                                          | <b>1</b> | <b>1</b>                                          | <b>0</b> | <b>0</b>                                          | <b>0</b> | <b>0</b>                                          | <b>0</b> | <b>0</b>                                          | <b>0</b> | <b>2</b>                                          | <b>0</b> | <b>5</b>      | <b>1</b> |
| Anorexia                                 | 0                                                 | 0        | 0                                                 | 0        | 1                                                 | 0        | 0                                                 | 0        | 0                                                 | 0        | 0                                                 | 0        | 0                                                 | 0        | 1             | 0        |
| Dehydration                              | 0                                                 | 0        | 0                                                 | 0        | 0                                                 | 0        | 0                                                 | 0        | 0                                                 | 0        | 0                                                 | 0        | 2                                                 | 0        | 2             | 0        |
| Hypokalemia                              | 0                                                 | 0        | 2                                                 | 1        | 0                                                 | 0        | 0                                                 | 0        | 0                                                 | 0        | 0                                                 | 0        | 0                                                 | 0        | 2             | 1        |
| Hyponatremia                             | 0                                                 | 0        | 0                                                 | 0        | 0                                                 | 0        | 0                                                 | 0        | 0                                                 | 0        | 0                                                 | 0        | 1                                                 | 0        | 1             | 0        |
| <b>Musculoskeletal/connective tissue</b> | <b>0</b>                                          | <b>0</b> | <b>1</b>                                          | <b>0</b> | <b>1</b>      | <b>0</b> |
| Back pain                                | 0                                                 | 0        | 0                                                 | 0        | 0                                                 | 0        | 0                                                 | 0        | 0                                                 | 0        | 0                                                 | 0        | 1                                                 | 0        | 1             | 0        |
| <b>Nervous system</b>                    | <b>0</b>                                          | <b>0</b> | <b>1</b>                                          | <b>0</b> | <b>1</b>      | <b>0</b> |
| Dizziness                                | 0                                                 | 0        | 0                                                 | 0        | 0                                                 | 0        | 0                                                 | 0        | 0                                                 | 0        | 0                                                 | 0        | 1                                                 | 0        | 1             | 0        |
| <b>Respiratory/thoracic/mediastinal</b>  | <b>0</b>                                          | <b>0</b> | <b>1</b>                                          | <b>0</b> | <b>0</b>                                          | <b>0</b> | <b>1</b>      | <b>0</b> |
| Dyspnea                                  | 0                                                 | 0        | 1                                                 | 0        | 0                                                 | 0        | 0                                                 | 0        | 0                                                 | 0        | 0                                                 | 0        | 0                                                 | 0        | 1             | 0        |
| <b>Vascular disorders</b>                | <b>0</b>                                          | <b>0</b> | <b>1</b>                                          | <b>0</b> | <b>1</b>      | <b>0</b> |
| Hypotension                              | 0                                                 | 0        | 0                                                 | 0        | 0                                                 | 0        | 0                                                 | 0        | 0                                                 | 0        | 0                                                 | 0        | 1                                                 | 0        | 1             | 0        |
